# Supplementary material for: Cost-effectiveness of clostridial collagenase ointment on wound closure in patients with diabetic foot ulcers: economic analysis of results from a multicenter, randomized, open-label trial
Source: PubMed Central journal article supplement (PMC4357050; doi:10.1186/s13047-015-0065-x), 2015-02-28
Supplement: 13047_2015_65_MOESM3_ESM.pdf [file 13047_2015_65_MOESM3_ESM.pdf]

**Supplementary Table 1. Monte Carlo simulation results\***

| <b>Results</b>                | <b>CCO + SSD</b> | <b>Control</b> |
|-------------------------------|------------------|----------------|
| Effectiveness mean            | 35               | 28             |
| Effectiveness SD              | 1                | 2              |
| Effectiveness minimum         | 29               | 20             |
| Effectiveness 2.5 percentile  | 32               | 24             |
| Effectiveness median          | 35               | 28             |
| Effectiveness 97.5 percentile | 37               | 32             |
| Effectiveness maximum         | 40               | 35             |
| Cost mean                     | \$2,098          | \$2,381        |
| Cost SD                       | \$382            | \$273          |
| Cost minimum                  | \$776            | \$1,387        |
| Cost 2.5 percentile           | \$1,455          | \$1,884        |
| Cost median                   | \$2,061          | \$2,367        |
| Cost 97.5 percentile          | \$2,971          | \$2,964        |
| Cost maximum                  | \$4,405          | \$3,606        |

CCO, clostridial collagenase ointment; SD, standard deviation; SSD, serial sharp debridement

\*Effectiveness measure was ulcer-free weeks.
